# Supplementary material for: The Impact of Biliary Reconstruction Methods on Small Partial Liver Grafts
Source: PubMed Central journal article supplement — Transplant Direct. 2020 Jan 13;6(2):e523. doi: 10.1097/TXD.0000000000000966 (PMC7004631; doi:10.1097/txd.0000000000000966), 2020-01-13
Supplement: txd-6-e523-s002.pdf [file txd-6-e523-s002.pdf]

# Figure S2

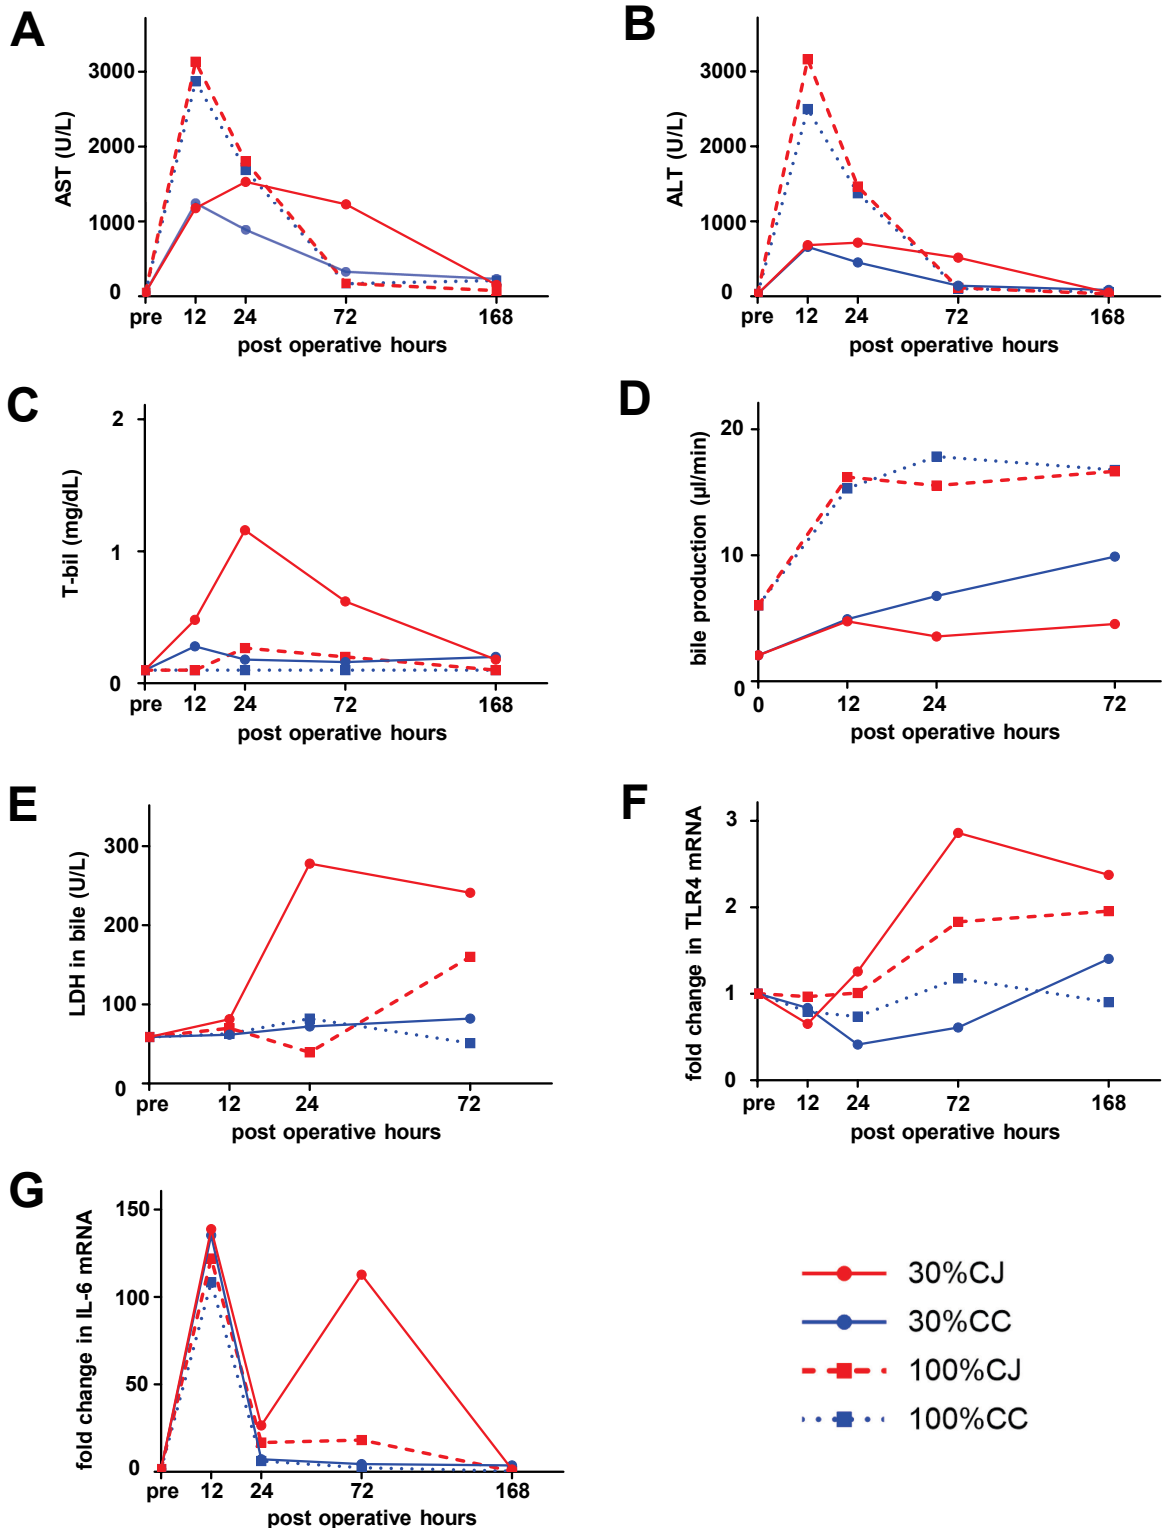

**Figure S2: Superposition of figures by the 30%CJ and 30% CC groups and figures by the 100%CJ and 100%CC groups**  
 To comprehend the general change of each parameter in the 30%CC and 30% CJ groups and the 100%CC and 100%CJ groups, superposition of figures was performed. Standard error bars were omitted. (A) AST change expressed by the superposition of Figure 2C and Figure S1A. (B) ALT change expressed by the superposition of Figure 2D and Figure S1B. (C) T-bil change expressed by the superposition of Figure 2E and Figure S1C. (D) Bile production volume change expressed by the superposition of Figure 2F and Figure S1D. (E) LDH in bile change expressed by the superposition of Figure 3C and Figure S1G. (F) Intrahepatic TLR4 mRNA expression change expressed by the superposition of Figure 3D and Figure S1H. (G) Intrahepatic IL-6 mRNA expression change expressed by the superposition of Figure 3E and Figure S1I. 30%CC indicates arterIALIZED 30% partial liver transplantation with choledocho-choledocho-stomy; 30%CJ, arterIALIZED 30% partial liver transplantation with choledocho-jejunostomy; 100%CC, arterIALIZED whole liver transplantation with choledocho-choledocho-stomy; 100%CJ, arterIALIZED whole liver transplantation with choledocho-jejunostomy; ALT, alanine aminotransferase; AST, aspartate aminotransferase; IL, interleukin; LDH, lactate dehydrogenase; T-bil, total bilirubin; TLR, toll-like receptor.
